# Supplementary material for: Validation of Diagnosis Codes to Identify Infection-Related Acute Care Events in Patients With Glomerular Disease
Source: PubMed Central journal article supplement — Kidney Int Rep. 2021 Aug 23;6(12):3079–82. doi: 10.1016/j.ekir.2021.08.019 (PMC8640562; doi:10.1016/j.ekir.2021.08.019), 2021-08-23
Supplement: mmc1.pdf [file mmc1.pdf]

## **Supplementary Material**

Supplementary Tables

Supplementary References

Acknowledgments

**Supplementary Table 1:** International Statistical Classification of Diseases and Related Health Problems 10th Revision (ICD-10) codes used in the Development Phase

| <b>Disease Group</b>                                           | <b>CureGN<sup>1*</sup></b>                                                                                                                     | <b>Sahli et al<sup>2</sup></b>                                                                                                                                                                                                                                                      | <b>Baker et al<sup>3**</sup></b>                                                                                                                                                                                                                                 | <b>USRDS<sup>4</sup></b>                                                                                                                                                                                                                                             |
|----------------------------------------------------------------|------------------------------------------------------------------------------------------------------------------------------------------------|-------------------------------------------------------------------------------------------------------------------------------------------------------------------------------------------------------------------------------------------------------------------------------------|------------------------------------------------------------------------------------------------------------------------------------------------------------------------------------------------------------------------------------------------------------------|----------------------------------------------------------------------------------------------------------------------------------------------------------------------------------------------------------------------------------------------------------------------|
| <b>HEENT infections (including oral and upper respiratory)</b> | <i>B3781, J020, J030, J0301, B30, H00036, H05013, H10, H60399, H650, H6500, H651, H65199, H669, J00-J06, J029, J32, J340, J069, J350, J050</i> | H00, H05.0, H06.1, H10.0, H13.0, H13.1, H19.0-H19.2, H22.0, H32.0, H44.0, H44.1, H45.1, H58.8, H59.8, H60.0-H60.3, H62.0-H62.4, H66.0-H66.4, H67.0, H67.1, H70, H75.0, H94.0, J32, J34.0, J36, J37.8, J39.0, J39.1, K04.0, K04.1, K04.4, K04.6, K04.7, K05.2, K11.3, K11.2, J00-J06 | B30, H000, H03, H043, H050, H100-H103, H109, H130, H131, H160, H190-H192, H220, H440, H451, H600-H603, H608, H609, H62, H65-H67, H680, H70, H730, H750, H830, H940, J00-J06, J32, J340, J36, J37, J390, J391, K02, K044, K046, K050, K052, K053, K113, K122, C11 | H00.011-H10.9, H16.251-H16.269, H32, H66.001-H66.43, H67.1-H67.9, H70.001-H70.93, H75.00-H75.83, H83.01-H83.09, H92.10-H92.13, H95.00-H95.199, J31.0-J32.9, J35.01-J35.03, J36-J37.1, J39.0-J39.2, J95.02, K04.6, K04.7, K11.3, K12.2 C11                            |
| <b>Infections involving upper and lower respiratory tract</b>  | <i>J09X2, A370, A3791</i>                                                                                                                      |                                                                                                                                                                                                                                                                                     |                                                                                                                                                                                                                                                                  | J00-J18.1                                                                                                                                                                                                                                                            |
| <b>Lower respiratory tract infections</b>                      | <i>J110, J123, A0103, A5484, B59, J153, J200, J128, J129, J15, J158, J159, J16, J168, J18, J20, J40, J90</i>                                   | J09-J18, J20-J22, J85.0-J85.2, J86                                                                                                                                                                                                                                                  | A15, J65, A481, A482, B59, J09-J18, J20-J22, J40-J42, J440, J47, J85, J86, J988, B44                                                                                                                                                                             | J18.8-J21.9, J40, J41.1, J47.0-J47.9, J85.0-J85.2, J86.0-J92.9, J94.0-J94.9, R09.1                                                                                                                                                                                   |
| <b>Cardiac and vascular infections</b>                         |                                                                                                                                                | I30.1, I32.0, I32.1, I33, I38, I40.0, I41.0-I41.2, I98.0, I98.1                                                                                                                                                                                                                     | B332, I00-I02, I05-I09, I301, I33, I38-I412, I430, I716, I790, I791, T826, T827                                                                                                                                                                                  | I09.2, I32, I33.0, I39-I40.8, I41, M35.2                                                                                                                                                                                                                             |
| <b>Gastrointestinal and hepatobiliary infections</b>           | <i>A040, A044, A047, J112, A084, A09, K5720, K5732, K578, K610, K652, K659, K85</i>                                                            |                                                                                                                                                                                                                                                                                     | A00-A09, I880, K528, K529, R11, K230, K231, K25-K28, K293-K295, K35-K37, K61, K630, K632, K650, K678, K908, K930, K750, K770, K830, B15-B19, C161-C166, C168, C169, C210, C211, C220, D002, D013, D06                                                            | K35.2-K37, K50.014, K50.114, K50.814-K51.014, K51.214-K51.514, K51.814, K51.914, K57.00, K57.01, K57.20, K57.21, K57.40, K57.41, K57.80, K57.81, K61.0-K61.4, K63.0, K65.0-K65.9, K67-K68.9, K71.0-K71.9, K75.0-K75.3, K75.81-K75.9, K76.4, K77, K81.0-K81.9, K90.81 |
| <b>Central nervous system infections</b>                       | G039                                                                                                                                           | G00-G07, G53.0, G53.1, G63.0, G73.4, G94.0                                                                                                                                                                                                                                          | A801-A804, A809, A811, A812, A818, A819, A82-A89, G00-G02, G030, G039, G04-G610, A17                                                                                                                                                                             | G00.0-G04.02, G04.2-G09, G14, G37.4, G92, I67.3                                                                                                                                                                                                                      |
| <b>MSK and integumentary infections</b>                        | <i>M0020, M8600</i>                                                                                                                            | M00, M01, M60.0, M63.0-M63.2, M65.0, M65.1, M68.0, M71.0, M71.1, M73.0, M73.1, M86, M90.0-M90.2                                                                                                                                                                                     | M462, M463-M465, M00, M01, M021, M023, M03, M600, M630-M632, M650, M651, M680, M710, M711, M896, T845-T847, T857, T874                                                                                                                                           | L94.6, M00.00-M01.X9, M02.10-M02.19, M02.30-M02.89, M46.20-M46.39, M86.00-M86.9, M90.80-M90.89                                                                                                                                                                       |

|                                                                 |                                                                                              |                                                                                                                                                      |                                                                                                                                                                                                                                                                                                              |                                                                                                                                                                                                                                                                |
|-----------------------------------------------------------------|----------------------------------------------------------------------------------------------|------------------------------------------------------------------------------------------------------------------------------------------------------|--------------------------------------------------------------------------------------------------------------------------------------------------------------------------------------------------------------------------------------------------------------------------------------------------------------|----------------------------------------------------------------------------------------------------------------------------------------------------------------------------------------------------------------------------------------------------------------|
| <b>Kidney and genitourinary infections</b>                      | N110, N111, N390, N451, N751                                                                 | N08.0, N10, N12, N13.6, N15.1, N16.0, N22.0, N29.0, N29.1, N30.0, N33, N34, N39.0, N41, N43.1, N45, N48.1, N48.2, N49, N51, N61, N70-N77.1, O23, O86 | A55, A57-A60, N00, N05, N10, N136, N151, N300, N341, N351, N37, N390, N410-N413, N431, N45, N481, N482, N490, N49, N51, N70-N74, N751, N764, N87, C53, T835, T836                                                                                                                                            | N10-N12, N13.6, N15.1, N15.9, N16, N28.84-N28.86, N30.0- N30.31, N30.80, N30.81, N34.0-N34.3, N35.111-N35.12, N37-N39.0, N41.0-N41.9, N45.1-N45.4, N47.6, N48.1-N48.29, N49.0-N49.9, N51, N70.01-N74, N75.1, N76.0-N76.4, N77.1, N98.0, O86.12, O86.81, O86.89 |
| <b>Dermatologic infections</b>                                  | <i>B372, B369, L03011, L03113, L03115, L03211, L03314, L0390</i>                             | L00-L08                                                                                                                                              | A46, L00-L04, L050, L08, B86, S1013, S1083, S1093, S2013, S2033, S2043, S2083, S3083, S3093, S4083, S5083, S6083, S7083, S8083, S9083, T009, T0903, T1108, T1303, T1403, T633, T634, T793, T8901, T8902, B35, B36, B42, B43, B47                                                                             | L01.0-L08.9, L44.4, L70.2, L88, L92.8, L98.0, L98.3                                                                                                                                                                                                            |
| <b>Sepsis, bacteremia, and fungemia</b>                         | <i>A413, A4151, A41, A4159, A419, B7881</i>                                                  | O85                                                                                                                                                  | A40, A41, A39, A19                                                                                                                                                                                                                                                                                           | O85, R78.81                                                                                                                                                                                                                                                    |
| <b>System unspecified infections and/or systemic infections</b> | <i>J09, J09X, J10, J11, B9789, B34, B349, B951, B952, B958, B9620, A490, A499, B37, R509</i> | A00-B99, O75.3, O98                                                                                                                                  | A50-A54, A56, A63, A64, B20, A18, C46, T802, T814, A20-A28, A30-A38, A42-A44, A480, A483, A484, A488, A49, A65-A71, A74, A75, A77-A79, B95, B96, A90-A96, A98, A99, B00-B07, A08, B09, B25-B27, B33, B34, B97, B37-B41, B45, B46, B48-B58, B60, B64-B83, B85-B89, B94, B99, E033, E321, F024, F071, I88, T64 | A00.0-A32.9, A35-B99.9, D86.0-D86.9, G93.7, I00-I02.9                                                                                                                                                                                                          |
| <b>Other infections</b>                                         | R05                                                                                          | U80, U81, U88, U89, O91                                                                                                                              | N290, B21, B22, B23, B24, A16, N740, N741, N61                                                                                                                                                                                                                                                               | R11.11, E32.1, N61                                                                                                                                                                                                                                             |

\*Codes in *italics* indicate CureGN database codes that are pathogen-specific

\*\*Baker et al included ICD-10 codes for adverse reactions to infectious disease treatment that are not shown in this table. Infection-related neoplasms have been sorted by primary location of neoplasm.

## Supplementary References

1. Glenn DA, Henderson CD, O'Shaughnessy M, et al. Infection-Related Acute Care Events among Patients with Glomerular Disease. *Clin J Am Soc Nephrol*. 2020;15(12):1749-1761. doi:10.2215/CJN.05900420
  2. Sahli L, Lapeyre-Mestre M, Derumeaux H, Moulis G. Positive predictive values of selected hospital discharge diagnoses to identify infections responsible for hospitalization in the French national hospital database: PPV of Hospitalization for Infection Codes in France. *Pharmacoepidemiol Drug Saf*. 2016;25(7):785-789. doi:10.1002/pds.4006
  3. Baker MG, Barnard LT, Kvalsvig A, et al. Increasing incidence of serious infectious diseases and inequalities in New Zealand: a national epidemiological study. *The Lancet*. 2012;379(9821):1112-1119. doi:10.1016/S0140-6736(11)61780-7
  4. United States Renal Data System. *Volume 2: ESRD Analytical Methods*.; 2018:661.
- S1 Henriksen DP, Nielsen SL, Laursen CB, Hallas J, Pedersen C, Lassen AT. How Well Do Discharge Diagnoses Identify Hospitalised Patients with Community-Acquired Infections? – A Validation Study. Pizzol FD, ed. *PLoS ONE*. 2014;9(3):e92891.
- S2 Holland-Bill L, Xu H, Sørensen HT, et al. Positive predictive value of primary inpatient discharge diagnoses of infection among cancer patients in the Danish National Registry of Patients. *Ann Epidemiol*. 2014;24(8):593-597.e18.

## **CureGN Collaborators**

The CureGN Consortium members listed below, from within the four Participating Clinical Center networks and Data Coordinating Center, are acknowledged by the authors as Collaborators.

\*\*CureGN Principal Investigators; \*CureGN Site Principal Investigators; #CureGN Lead Coordinators.

## **CureGN Participating Clinical Centers (PCC) through Columbia University:**

Columbia University, New York, NY, US: Woojin Ahn, Gerald Appel, Paul Appelbaum, Revekka Babayev, Andrew Bomback, Eric Brown, Pietro Canetta, Lucrezia Carlassara, Brenda Chan, Vivette Denise D'Agati, Samitri Dogra, Hilda Fernandez, Ali Gharavi<sup>\*\*</sup>, William Hines, Syed Ali Husain, Namrata Jain, Krzysztof Kiryluk, Fangming Lin, Maddalena Marasa<sup>#</sup>, Glen Markowitz, Hila Milo Rasouly, Sumit Mohan, Nicola Mongera, Jordan Nestor, Thomas Nickolas, Jai Radhakrishnan, Maya Rao, Simone Sanna-Cherchi, Shayan Shirazian, Michael Barry Stokes, Natalie Uy, Anthony Valeri, Natalie Vena

University of Warsaw, Warszawa, Poland: Bartosz Foronczewicz, Barbara Moszczuk, Krzysztof Mucha<sup>\*</sup>, Agnieszka Perkowska-Ptasińska

Gaslini Children's Hospital, Genoa, Italy: Gian Marco Ghiggeri<sup>\*</sup>, Francesca Lugani

## **CureGN Participating Clinical Centers (PCC) through the Midwest Pediatric Nephrology Consortium:**

Arkana Laboratories, Little Rock, AR, USA: Josephine Ambruzs, Helen Liapis

Children's Hospital of Michigan, Detroit, MI, USA: Rossana Baracco, Amrisha Jain<sup>\*</sup>

Children's Hospital of New Orleans/LSU Health, New Orleans, LA, USA: Isa Ashoor, Diego Aviles<sup>\*</sup>

Children's Mercy Hospital, Kansas City, MO, USA: Tarak Srivastava<sup>\*</sup>

Children's National Medical Center, Washington DC, USA: Sun-Young Ahn<sup>\*</sup>

Cincinnati Children's Hospital Cincinnati, OH, USA: Prasad Devarajan, Elif Erkan<sup>\*</sup>, Donna Claes, Hillary Stone

Connecticut Children's Medical Center, Hartford, CT, USA: Sherene Mason<sup>\*</sup>, Cynthia Silva

Duke Children's Hospital Medical Center, Durham, NC, USA: Rasheed Gbadegesin<sup>\*</sup>

East Carolina University Brody School of Medicine, Greenville, NC, USA: Liliana Gomez-Mendez<sup>\*</sup>

Emory University, Atlanta, GA, USA: Larry Greenbaum<sup>\*\*</sup>, Chia-shi Wang, Hong (Julie) Yin

Helen DeVos Children's Hospital, Grand Rapids, MI, USA: Yi Cai<sup>\*</sup>, Goebel Jens, Julia Steinke

Levine Children's Hospital/ Carolinas Medical Center, Charlotte, NC, USA: Donald Weaver<sup>\*</sup>

Lurie Children's Hospital, Chicago IL, USA: Jerome Lane<sup>\*</sup>

Mayo Clinic, Rochester, MN, USA: Carl Cramer<sup>\*</sup>

Medical College of Wisconsin, Milwaukee, WI, USA: Cindy Pan, Rajasree Sreedharan<sup>\*</sup>

Medical University of South Carolina, Charleston SC, USA: David Selewski, Katherine Twombly<sup>\*</sup>

Nationwide Children's Hospital, Columbus, OH, USA: Corinna Bowers<sup>#</sup>, Mary Dreher<sup>#</sup>

Mahmoud Kallash<sup>\*</sup>, John Mahan, Samantha Sharpe<sup>#</sup>, William Smoyer<sup>\*\*</sup>

Oregon Health and Science University, Portland, OR, USA: Amira Al-Uzri<sup>\*</sup>, Sandra Iragorri

Riley Children's Hospital, Indianapolis, IN, USA: Myda Khalid<sup>\*</sup>

Cardinal Glennon Children's Medical Center/ St. Louis University, St. Louis, MO, USA: Craig Belsha<sup>\*</sup>

Texas Children's Hospital, Houston, TX, USA: Michael Braun, AC Gomez, Scott Wenderfer<sup>\*</sup>

Texas Tech Health Sciences Center, Amarillo, TX, USA: Tetyana Vasylyeva<sup>\*</sup>

Children's of Alabama, University of Alabama, Birmingham, AL, USA: Daniel Feig<sup>\*</sup>

University of Colorado Children's Hospital, Colorado, Aurora, CO, USA: Gabriel Cara Fuentes, Melisha Hannah\*

University of Iowa Children's Hospital, Iowa City, IA, USA: Carla Nester\*

University of Kentucky, Lexington, KY, USA: Aftab Chishti\*

University of Louisville, Louisville, KY, USA: Jon Klein\*\*

Holtz Medical Center, University of Miami, Miami, FL, USA: Chryso Katsoufis, Wacharee Seeherunvong\*

University of Minnesota Children's Hospital, Minneapolis, MN, USA: Michelle Rheault\*

University of New Mexico Health Sciences Center, Albuquerque, NM, USA: Craig Wong\*

University of Oklahoma Health Sciences Center, Oklahoma City, OK, USA: Nisha Mathews\*

University of Virginia, Charlottesville, VA, USA: John Barcia\*, Agnes Swiatecka-Urban

University of Wisconsin, Madison, WI, USA: Sharon Bartosh\*

Vanderbilt Children's Hospital, Nashville TN, USA: Tracy Hunley\*

Washington University in St. Louis, St. Louis, MO, USA: Vikas Dharnidharka\*, Joseph, Gaut

**CureGN Participating Clinical Centers (PCC) through the University of North Carolina:**

Hôpital Maisonneuve-Rosemont, Montreal, Canada: Louis-Philippe Laurin\*, Virginie Royal

Medical University of South Carolina, Charleston, SC, USA: Anand Achanti, Milos

Budisavljevic\*, Sally Self

Northwestern University, Chicago, IL, USA: Cybele Ghossein, Shikha Wadhvani\*

Ohio State University, Columbus, OH, USA: Salem Almaani, Isabelle Ayoub, Tibor Nadasdy, Samir, Parikh, Brad Rovin\*

University of Chicago, Chicago, IL, USA: Anthony Chang

University of Alabama at Birmingham, Birmingham, AL, USA: Huma Fatima, Jan Novak, Matthew Renfrow, Dana Rizk\*

University of North Carolina Kidney Center, Chapel Hill, NC, USA: Dhruvi Chen, Vimal Derebail, Ronald Falk\*\*, Keisha Gibson, Susan Hogan, Koyal Jain, J. Charles Jennette, Amy Mottl\*, Caroline Poulton#, Manish Kanti Saha

Vanderbilt University, Nashville, TN, USA: Agnes Fogo, Neil Sanghani\*

Virginia Commonwealth University, Richmond, VA, USA: Jason Kidd\*, Hugh Massey, Selvaraj Muthusamy

**CureGN Participating Clinical Centers (PCC) through the University of Pennsylvania:**

MetroHealth Medical Center/Case Western Reserve University, Cleveland, OH, USA: Santhi Ganesan, Agustin Gonzalez-Vicente, Jeffrey Schelling\*

Cedars-Sinai Health System, Los Angeles, CA, USA: Jean Hou

Children's Hospital of LA, Los Angeles, CA, USA: Kevin Lemley\*, Warren Mika, Pierre Russo

Children's Hospital of Philadelphia, Philadelphia, PA, USA: Michelle Denburg, Amy Kogon, Kevin Meyers\*, Madhura Pradhan

Cleveland Clinic, Cleveland, OH, CA: Raed Bou Matar\*, John O'Toole\*, John Sedor\*

Cohen Children's Medical Center, New Hyde Park, NY, USA: Christine Sethna\*

Johns Hopkins University, Baltimore, MD, USA: Serena Bagnasco, Michael Choi, Alicia Neu, John Sperati\*

Lundquist Institute at Harbor-UCLA Medical Center, Torrance, CA, USA: Sharon Adler\*, Tiane Dai, Ram Dukkipati

Mayo Clinic, Rochester, MN, USA: Fernando Fervenza\*, Sanjeev Sethi

Montefiore Medical Center, The Bronx, New York, NY, USA: Frederick Kaskel, Kaye Brathwaite, Kimberly Reidy\*

New York University, New York, NY, USA: Suzanne Vento #, Joseph Weisstuch, Ming Wu, Olga Zhdanova

NIDDK, Bethesda, MD, USA: Jurgen Heymann, Jeffrey Kopp\*, Meryl Waldman, Cheryl Winkler

Spokane Providence Medical Center, Spokane, WA, USA: Katherine Tuttle\*

Stanford University, Palo Alto, CA, USA: Jill Krissberg, Richard Lafayette\*

Sunnybrook Health Sciences Centre, Toronto, Canada: Michelle Hladunewich\*

The Hospital for Sick Children, Toronto, Canada: Rulan Parekh\*

University Health Network, Toronto, Canada: Carmen Avila-Casado, Daniel Cattran\*, Reich Heather, Philip Boll

University of Miami, Miami, FL, USA: Yelena Drexler, Alessia Fornoni\*

University of Michigan, Ann Arbor, MI, USA: Patrick Gipson\*, Jeffrey Hodgins, Andrew Oliverio

University of Pennsylvania, Philadelphia, PA, USA: Jon Hogan, Lawrence Holzman\*\*, Matthew Palmer

University of Pittsburgh School of Medicine, Pittsburgh, PA, USA: Blaise Abromovitz\*, Michael Mortiz\*

University of Washington, Seattle, WA, USA: Charles Alpers, J. Ashley Jefferson\*

UT Southwestern, Dallas, TX, USA: Elizabeth Brown, Kamal Sambandam\*

**Data Coordinating Center (DCC):**

Arbor Research Collaborative for Health, Ann Arbor, MI, USA: Bruce Robinson\*\*, Abigail Smith

Cedar Sinai Medical Center, Los Angeles, CA, USA: Cynthia Nast

Duke University, Durham, NC, USA: Laura Barisoni

University of Michigan, Ann Arbor, MI, USA: Brenda Gillespie\*\*, Deb Gipson\*\*, Maggie Hicken, Matthias Kretzler\*\*, Laura Mariani

**Steering Committee Chair:** Lisa M. Guay-Woodford, Children's National Hospital, Washington DC, USA
